# Supplementary material for: ENSO-triggered floods in South America: correlation between maximum monthly discharges during strong events
Source: Copernicus journal article supplement (doi:10.5194/hess-2018-107), 2018-04-03
Supplement: Supplementary file [file hess-2018-107-AC1-supplement.pdf]

The referee Uijlenhoet understood perfectly the virtues and deffects of the manuscript.

The correlation of the monthly peak discharges is the main contribution (the figure 9).

Methods descriptions can be improved.

The results are difficult to extend as the hydrological records from some countries of South America have been discontinued. Many stations were abandonned after being destroyed several times during floods. In some countries the length of the records is certainly very short. although the importance of them is crucial for social purposes.

I will improve the manuscript focusing on the quality of the data and the physical cause of the correlation found (both suggested)

Please, let me know when I should upload a new version.

Best wishes

Federico Isla
