# Supplementary material for: ENSO-triggered floods in South America: correlation between maximum monthly discharges during strong events
Source: Copernicus journal article supplement (doi:10.5194/hess-2018-107), 2018-04-03
Supplement: Supplementary file [file hess-2018-107-RC2-supplement.pdf]

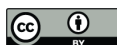

# 1 **ENSO-triggered floods in South America:** 2 **correlation between maximum monthly discharges during strong events**

3 Federico Ignacio Isla

4 Instituto de Geología de Costas y del Cuaternario (UNMDP-CIC)

5 Instituto de Investigaciones Marinas y Costeras (UNMDP-CONICET)

6 Funes 3350, Mar del Plata 7600, Argentina, +54.223.4754060, [fisla@mdp.edu.ar](mailto:fisla@mdp.edu.ar)

7

## 8 **Abstract**

9 ENSO-triggered floods altered completely the annual discharge of many watersheds of South America. Anomalous  
 10 years as 1941, 1982-83, 1997-98 and 2015-16 signified enormous fluvial discharges draining towards the Pacific  
 11 Ocean, but also to the Atlantic. These floods affected large cities built on medium-latitudinal Andes (Lima, Quito,  
 12 Salta), but also those located at floodplains, as Porto Alegre, Blumenau, Curitiba, Asunción, Santa Fe and Buenos  
 13 Aires. Maximum discharge months are particular and easily distinguished along time series from watersheds located  
 14 at the South American Arid Diagonal. At watersheds conditioned by precipitations delivered from the Atlantic or  
 15 Pacific anti-cyclonic centers, the ENSO-triggered floods are more difficult to discern. The floods of 1941 affected  
 16 70,000 inhabitants in Porto Alegre. In 1983, Blumenau city was flooded during several days; and the Paraná River  
 17 multiplied 15 times the width of its middle floodplain. That year, the Colorado River in Northern Patagonia  
 18 connected for the last time to the Desagüadero – Chadileuvú - Curacó system and its delta received saline water for  
 19 the last time. During strong ENSO years the water balances of certain piedmont lakes of Southern Patagonia are  
 20 modified as the increases in snow accumulations cause high water levels, with a lag of 13 months. The correlation  
 21 between the maximum monthly discharges of 1982-83 and 1997-98 at different regions and watersheds indicates  
 22 they can be forecasted for future floods triggered by same phenomena. South American rivers can be classified  
 23 therefore into ENSO-affected and ENSO-dominated for those within the Arid Diagonal that are exclusively subject  
 24 to high discharges during those years.

25 Keywords: floods, El Niño-Southern Oscillation, South America, maximum monthly discharges

26





## 27 1. Introduction

28 El Niño events were known before the Spanish colonized the Peru region because of their consequences on the  
 29 anchovy fishery. They were also known by seasonal heavy rainfalls and rapid floods in tropical South America.  
 30 However, Jules Verne generated these flash floods as occurring on the Pampas plains in his book *Les enfants du*  
 31 *Capitaine Grant* (1868, reproduced in 1962 in the Disney's movie *In search of the Castaways*). These floods do not  
 32 occur as rapid; they are the response of several weeks or months with rains over the average.

33 Their origin is well known: immense volumes of water transported across the Pacific Ocean during certain  
 34 anomalous years, the so-called “*El Niño*” or ENSO years (Vargas et al. 2000; Andreoli and Kayano 2005). Although  
 35 this interannual anomalous years are known by their climatic and oceanographic consequences, their hydrological  
 36 responses in South American rivers have not been carefully reported. One to the main reason is the lack of  
 37 information about rains records (Sun et al., 2015) and also of long and continuous hydrological records (Ward et al.  
 38 2016).

39 Rapid floods at the Andes watersheds occur during strong ENSO years, impacting in Peru, Ecuador and Northern  
 40 Chile. They are significantly recorded when they affect arid watersheds comprised within the South American Arid  
 41 Diagonal. However, these interannual floods also affect extended Atlantic watersheds of rivers as the Paraguay,  
 42 Bermejo, Pilcomayo and Salado. This manuscript reported the available records of these floods -in their monthly  
 43 periodicity-, compiled at national agencies of different countries (Ecuador, Peru, Chile, Paraguay, Brazil, Argentina  
 44 and Uruguay). Environmental and social impacts of these floods in South America were reported considering  
 45 specially that the floods triggered by El Niño-La Niña are significantly longer (Ward et al. 2016).

46

## 47 2. Climate

48 Central South America has a subtropical to temperate climate. Humidity is provided from the east by trade winds  
 49 from the anti-cyclonic center of the South Atlantic. Further south, humidity is also provided by westerly winds from  
 50 the South-Pacific anti-cyclonic center. Between both humid areas, the Arid South American Diagonal (ASAD)  
 51 extends from N to S, connecting the Atacama and Patagonian deserts (Fig. 1). Climate was considered as the main  
 52 variable governing the suspended sediment yields from catchments basins located to the E of the Andes between  
 53 Ecuador and Bolivia, either in its variability or indirectly conditioning the vegetation cover (Pepin et al. 2013).  
 54 Along the coast of Chile, rains increases from north to south (Valdés-Pineda et al. 2014; Araya Ojeda and Isla  
 55 2016). On the other hand, along the Eastern Patagonia coast, rains increase northwards (Coronato et al. 2008).

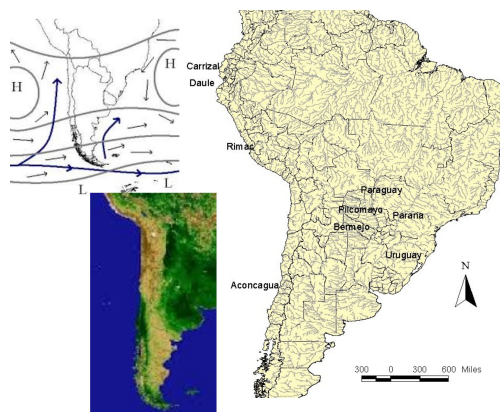

56



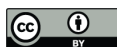

Fig. 1. A. B. South America is characterized by the ASAD connecting Atacama and Patagonia deserts. C. Major rivers of South America.

South America has significant temporal changes in its interannual precipitation. Precipitation has a linear response to El Niño occurrences (Andreoli and Kayano 2005). In regard to long-term precipitation, south of 15°S, there were positive jumps east of the Andes, with a negative trend toward the west (Minetti and Vargas 1997). Historical positive jumps occurred between 1946 and 1960 while the negative trend diminished from north (Antofagasta station) south (Islote Evangelista meteorological station).

In Southern Chile, and according to records measured at Valdivia, there was a significant decrease in precipitations between 1901 and 2005 (González-Reyes and Muñoz 2013). On the other coast, at the Argentine Pampas, there was an increase in 50-200 mm in the annual rains comparing two intervals: 1947-1976, and 1977-2006 (Forte Lay et al. 2008). The Pampa Region increases its precipitation rates during the last decades of 20th century (Scarpatti and Capriolo 2013). Several authors point to the early 70's as the epoch of significant increases in runoffs of the rivers Paraguay and Paraná (Pasquini and Depetris 2007). Notwithstanding this natural climatic scheme, significant variations in South America should be assigned to changes in the land use and land covers (Clark et al. 2012).

71

### 72 3. Methods

73 Monthly hydrological records were compiled and analyzed from the databases of different South American  
 74 countries (Table 1).

|           |                                                                                                                                                     |
|-----------|-----------------------------------------------------------------------------------------------------------------------------------------------------|
| Peru      | <a href="http://www.senamhi.gob.pe/">http://www.senamhi.gob.pe/</a>                                                                                 |
| Ecuador   | <a href="http://www.serviciometeorologico.gob.ec/caudales-datos-historicos/">http://www.serviciometeorologico.gob.ec/caudales-datos-historicos/</a> |
| Chile     | <a href="http://snia.dga.cl/BNAConsultas/reportes">http://snia.dga.cl/BNAConsultas/reportes</a>                                                     |
| Brazil    | <a href="http://hidroweb.ana.gov.br/HidroWeb.asp?Tocltem=4100">http://hidroweb.ana.gov.br/HidroWeb.asp?Tocltem=4100</a>                             |
| Argentina | <a href="http://www.mininterior.gov.ar/obras-publicas/rh-base.php">http://www.mininterior.gov.ar/obras-publicas/rh-base.php</a>                     |

75 Table 1. Web pages of the hydrological records of different countries of South America

76 Historical maps and TM images of the Landsat satellites were compared   
 77 flooding episodes from normal conditions.

78

## 79 4. Results

### 80 4.1. Ecuador and Peru

81 According to the Ecuadorian INAMH   
 82 occurred in 1977-78, 1982-83 and 1997-98. The floods of 1983 were triggered by enormous amounts of rainfall at  
 83 Western Ecuador (Rossel et al. 1996). The impacts caused by the strong ENSO of 1997-98 were estimated  
 84 according to different economic sectors: agriculture (43.6 MU\$), infrastructure of the sanitary sector (27.5 MU\$),  
 85 housing (3.2 MU\$) and industry (9.5 MU\$; Vaca 2010).





86 The Daule River (Fig. 1) was flooded in 1965, 1983, 1997-98 and 2012 (Fig. 2). Normally these maximum  
87 discharges occurred during the first months of the year (January to May). The worst floods were during the first  
88 months of 1998 with discharges over  $1300 \text{ m}^3/\text{s}$  (Fig. 2). At the boundary between Ecuador and Peru, the Zarumilla  
89 River increased its discharge during the years 1965, 1973, 1983 and 1998.

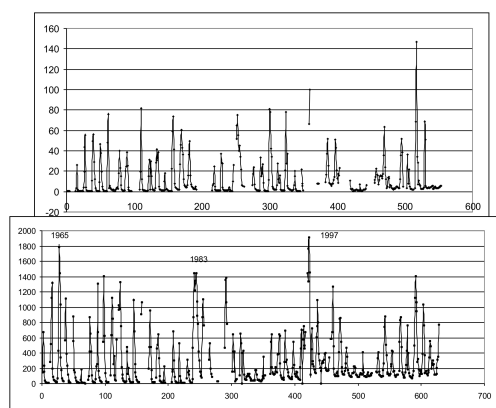

90  
91 Fig. 2. Monthly discharges of the Carrizal River and Daule River in La Capilla showing peaks in 1965, 1983,  
92 1997 and 2012.

93 Perú hydrological statistics are published every year by the SENAMHI (2016). The Rimac River (Fig. 1) flooded in  
94 1925 with a maximum daily discharge of  $600 \text{ m}^3/\text{s}$ ; an event considered the first “meganiño” of the 20<sup>th</sup> century  
95 (Rocha Felices 2011). It was also flooded in 1941 ( $385 \text{ m}^3/\text{s}$ ) and 1955 ( $380 \text{ m}^3/\text{s}$ ). Historical data from Perú  
96 indicates that there is a patchy distribution between different basins (Waylen and Caviedes 1986).

97

#### 98 4.2. Chile

99 Although Chilean floods may occur by different origins, 71% are associated to rainfalls. However, rainfalls are  
100 assumed to be diminishing in a long-term scenario (González-Reyes and Muñoz, 2013). Those floods associated  
101 exclusively to strong ENSO events occur northwards of  $36^\circ\text{S}$  (Rojas et al. 2014). However, significant discharges  
102 also occur at the south, but mask other floods triggered by local rains (Araya Ojeda and Isla 2016).

103 There is not a definite effect of ENSO anomalies along the whole Chile. Those rivers of Northern Chile comprised  
104 within the South American Arid Diagonal are specifically subject to anomalous precipitations. The two debris flow  
105 recorded in Antofagasta in 1940 (Vargas et al 2000) could have been also connected to the strong ENSO of  
106 1982-83 and 1997-98 ENSO rainfalls affected significantly Northern Chile (Meza 2013; Vargas et al.  
107 2006).

108 In Central Chile, the higher discharges of the Aconcagua River (Fig. 1) were related to ENSO events but with a  
109 certain delay (Waylen and Caviedes 1990). For the interval 1901-2003 there was a significant reduction of annual  
110 precipitation for the Valdivia region, southern Chile (González-Reyes and Muñoz, 2013). It has been proposed that  
111 the reduction in water yields in South-Central Chile is caused by land-use changes derived from the replacement of  
112 native forest by exotics (Little et al. 2009); afforestation significantly affect runoff at the Biobío on (Iroumé and  
113 Palacios 2013).





114

### 115 4.3. Brazil

116 Anomalous years affected some cities of Brazil. The floods of 1941 affected 70,000 inhabitants at the riverine area  
 117 of Porto Alegre (Fig. 3). City authorities constructed a dike in order to prevent another flood of the Guaíba fluvial  
 118 complex (Loitzenbauer et al. 2012).

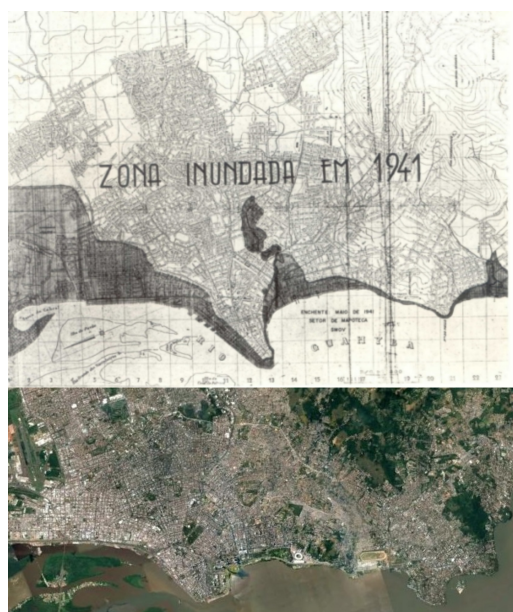

119

120 Fig. 3. A) Fluvial area of Porto Alegre flooded in 1941 B) Present area

121

122 The floods of 1983 of the Itajaí-Açu River caused the destruction of 30,000 houses at Blumenau. The level of the  
 123 river raised 16 m over normal level and stayed high for several days. 80% of the Itajaí County was affected. The  
 124 Iguaçu River, an affluent to the Paraná River (Fig. 1), flooded Curitiba in 1982 and 1983 signifying losses of 10,000  
 125 and 78,000 MU\$, respectively. Some neighborhoods (Tucci and Petry 2006).

### 126 4.4. Bolivia

127 The Pilcomayo River (Fig. 1) has a maximum discharge of  $3500 \text{ m}^3/\text{s}$  but 45 times its minimum discharge ( $80$   
 128  $\text{m}^3/\text{s}$ ; Rabicaluc 1986). This river has an alluvial fan of  $210,000 \text{ km}^2$  with several abandoned channels (Iriondo et al.  
 129 2000). The floods of the Upper Pilcomayo River of 1983 and 1984 (Fig. 4) increased 2-3 times the amount of  
 130 sediment transported in suspension (Malbrunot 2006). During normal years the river transports less than  $1 \times 10^6$  tons  
 131 of sediments; in 1984 it transported 2 and 3 millions of tons. The city of Villamontes (Tarija) is usually flooded by  
 132 the Pilcomayo River. Although a hydrologic gauge was installed in 1941, it operated randomly. A maximum level of  
 133  $7.98 \text{ m}$  was measured in March, 1984 with a maximum discharge of  $7000 \text{ m}^3/\text{s}$  (Böstein and Peña 1993). The last  
 134 flood was recorded during the beginning of 2018.



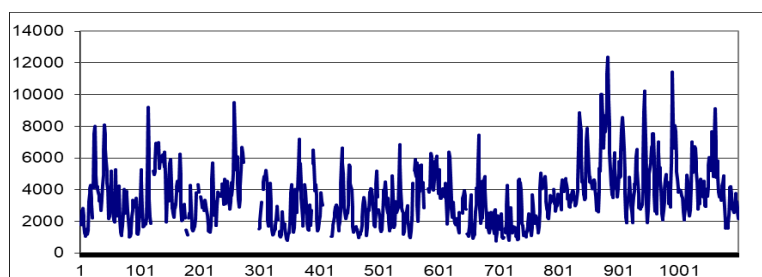

Fig. 4. Pilcomayo River floods at Puerto Pilcomayo with the peaks in 1983, 1997 and 2015

The Bermejo River (Fig. 1) also flows from Bolivia to Argentina, to the Paraná River. Based on historical archives, its hydrological cycles have been reconstructed (Prieto and Rojas 2015). Floods progressively increased since 1800. The deforestation has increased the climatic effects. Floods frequency diminished during the first half of the 20<sup>th</sup> century but increased significantly to the end of that century. These rivers that flow from the Andes to the Parana River (Paraguay, Pilcomayo, Bermejo) carried significant amount of particulate and dissolved substances. The plume of the Paraguay River persists isolated from the Upper Paraná water during approximately 225 km (Campodónico et al. 2015).

#### 4.5. Paraguay

The Republic of Paraguay is located between three rivers (Paraguay, Paraná and Pilcomayo), all belonging to the Río de la Plata watershed (Baez et al. 2014). The Paraguay River (Fig. 1) is about 2800 km long draining an area of about 1,095,000 km<sup>2</sup> (Collischonn et al. 2001). This large basin should be analyzed according to two regions: the northern related to the Amazonas River system, and the southern, subject to ENSO-triggered floods (Drago et al. 2008). This watershed is in close relation to the Patiño Aquifer (Monte Domecq and Baez Benítez 2007) and the Pantanal wetlands (Collischonn et al. 2001). During the winters of 1982 and 1983 the river had discharges of 9712 and 10663 m<sup>3</sup>/s, respectively (Monte Domecq et al. 2003; Barros et al. 2004). The two largest floods of the riverine areas of Asunción occurred in 1983 (63 m over MSL) and 1992 (62.3 m). During the floods of 1997/98 24,975 inhabitants were evacuated from Asunción, and 54,000 inhabitants from other departments (Neembucú, Concepción, Cordillera and Chaco). One of the major risks of the Paraguay River floods is that concerning the Cateura waste disposal of the Asunción city (Fig. 5). This dumping site is on the floodplain and very close to the international boundary with Argentina.

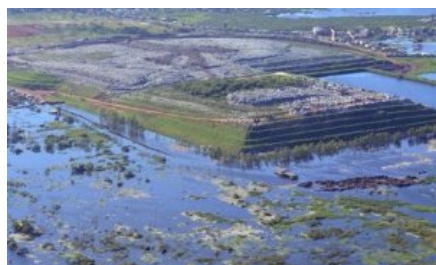

Fig. 5. During the ENSO 2015-2016 the waste disposal site of Asunción was flooded very close to the international boundary with Argentina.





161

162 **4.6. Argentina and Uruguay**

163 The Rio de la Plata received significant amount of water from the Upper Paraná (83%), 20% from the Paraguay  
 164 River, and about 7% from the rivers flowing from the west (Bermejo, Pilcaomayo and Salado; Pasquini and  
 165 Depertris 2010). The Paraná River (Fig. 1) flooded systematically during the last strong ENSOs (1982-83, 1997-98  
 166 and 2015; fig. 6). It multiplied 15 times the widths of its floodplain during the floods of 1982-83 (Drago 1989). This  
 167 extraordinary event signified high monthly streamflows in Corrientes during a year and half (Camilloni and Barros  
 168 2003).

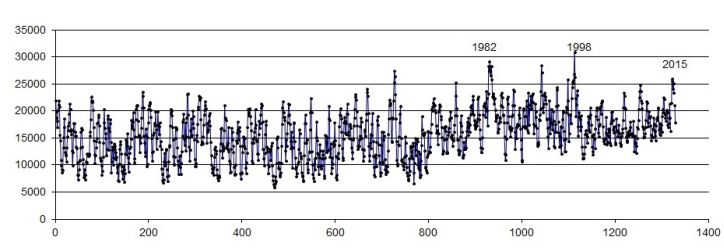

169

170 *Fig. 6. Hydrological record of the Paraná River at Timbúes Station (1901-2016).*

171 In Corrientes city, the discharge surpassed  $10,000 \text{ m}^3/\text{s}$  from July 1982 to December 1983 (Camilloni and Barros  
 172 2003), also affecting the localities of Resistencia, Barranqueras, Puerto Vilelas and Fontana (Fig. 7). The Paraná  
 173 River at Barranqueras reached the maximum 8.6-m level. Below the General Belgrano Bridge the discharge was  
 174  $58,000 \text{ m}^3/\text{s}$ .

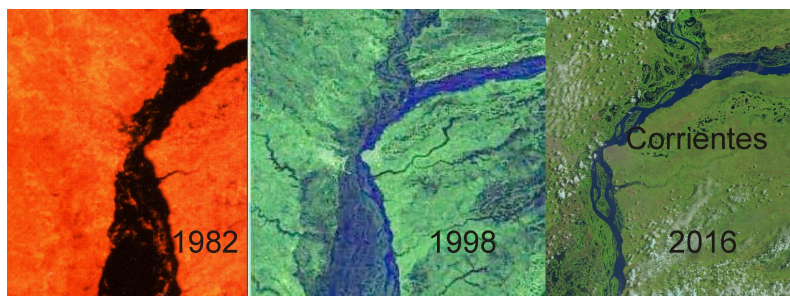

175

176 *Fig. 7. The floods of 1982, 1998 and 2016 affected the cities of Corrientes and Resistencia (Argentina).*

177 These floods signified the transport of subtropical floating plants (*Eichhornia crassipes*, also known as “water  
 178 hyacinth”) to temperate areas, and carrying dangerous fauna with them (snakes, spiders and lizards). Several fluvial  
 179 harbors as Rosario, Campana, Zárate and Buenos Aires were restricted in their operability during these events. At  
 180 the floodplain close to Rosario, the peak flows of 1982-83, 1992, and 1997-98 exceeded  $30,000 \text{ m}^3/\text{s}$  (Pérez et al. 2008).  
 181 During these extraordinary floods, the floodplain stores between  $23$  and  $123 \times 10^6 \text{ tons}$  of sediment (García et al. 2015).



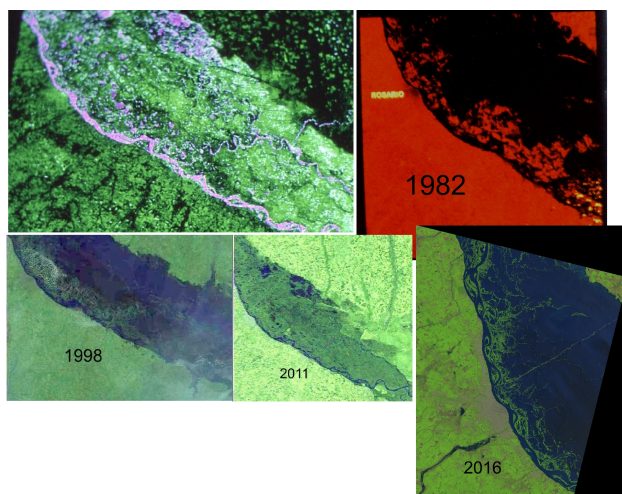

182

183 *Fig. 8. The Paraná River flooded several times restricting the operation of the harbor of Rosario*

184 The Uruguay River (**Fig. 1**) flooded in 1941, 1983 and 1997-98 (Isla and Toldo 2013). It has a mean discharge of  
 185 4315 m<sup>3</sup>/s (Balsa 2006). Harmonic analysis shows a dry period during the 1950-1960 decade, recorded also at the  
 186 Paraná watershed (Krepper et al. 2003).

187 The Colorado River (Northern Patagonia) is assumed to deactivate from the northern portion of the watershed  
 188 during the Holocene. During the floods of 1982-83, the whole watershed connected for the last time and saline water  
 189 arrived to the delta plain (Isla and Toldo 2013). Proglacial lakes of eastern Patagonia were also affected during  
 190 ENSO years: increments in the amount of snow during ENSO years produce high water levels of these lakes with a  
 191 lag of 13 months (Pasquini et al. 2008).

## 192 5. Maximum floods

193 Comparing the best recorded strong ENSOs (1982-83 and 1997-98) they produced similar maximum discharges in  
 194 Chile (Araya Ojeda and Isla 2016). The strong ENSO of 1997-98 was stronger in Ecuador (Daule and Carrizal  
 195 rivers). However, and comparing their maximum monthly discharges, these floods are correlated (Fig. 9). This  
 196 correlation is useful to precast the maximum discharges expected for future strong ENSOs. During the last two  
 197 centuries, the three strong ENSOs occurred in less than 40 years (1982-82, 1997-98 and 2015-2016) and are  
 198 therefore indicating a higher frequency in regard to previous years.



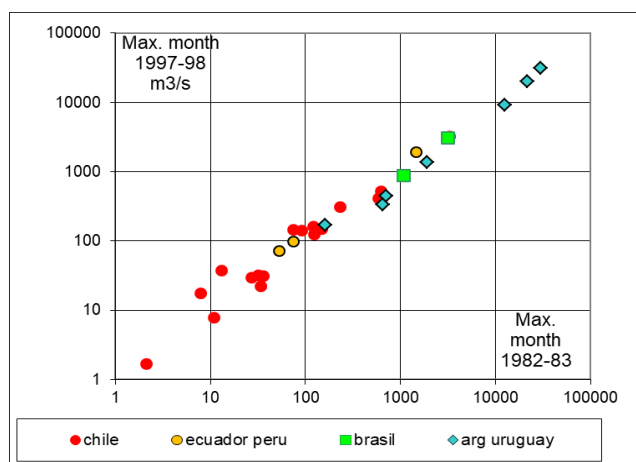

Fig. 9. Comparison of maximum discharges ( $\text{m}^3/\text{s}$ ) of the floods of 1982-83 and 1997-98.

## 6. Discussion

The ENSO events recorded during the Holocene are highly controversial (Clement et al. 2000). Although this review is based on hydrological measurements from countries with short series, there are some records that could be applied as historical and tree-ring records. Paleoclimatic studies indicate that in Northern Chile (north of  $30^\circ \text{S}$ ) there was an absence of heavy rainfalls between 8400 and 5300 years BP in conjunction to a decrease in ENSO activities at the Eastern Pacific Ocean (Ortega et al. 2012). Based on tree rings from the Bermejo River region, it was stated that for the last three centuries there was significant increments in the frequency, intensity and duration of floods and droughts since the second half of the 20<sup>th</sup> century (Ferrero et al. 2015). The last five extreme wet events occurred since 1814, the last three in the last 40 years. However, there were significant droughts in Western Pampas: the “Pampas Dust Bowl” occurred between 1930 and 1940 (Viglizzo and Clark 2006). Summarizing, for Northeastern Argentina 1901-1960 was a dry period while 1970-2003 was characterized by wet conditions (Lovino et al. 2014). ENSO floods occur with a different delay between the high-relief Andes watersheds draining towards the Pacific Ocean and those meandering towards the Atlantic Ocean. In Patagonia, the delay between the snow recharge and the raise in the piedmont lakes levels is about 13 months (Pasquini et al. 2008).

ENSO cycles do not only affect the hydrological records of South America. They also affect rivers of China causing variations in their sediment discharge (Liu et al. 2017), and can therefore be considered a good predictor for flood-affected and flood-destroyed crop areas (Zhang et al. 2016).

ENSO cycles, either Niños or Niñas, have significant effects on the global price of wheat. Niños cause reductions of 1.4% in its production while Niñas cause reductions of 4% (Ubilava 2017). Niños have positive effects regarding crop yields at the Argentine Pampa; maize and wheat yields increase during ENSOs, while the increase in soybean only occurred along some areas (Magrin et al. 1998). On the other hand, sunflower yields diminish during ENSO years. These increments are more significant in the north of the Pampas region (Fernández Long et al. 2011).

## 7. Conclusions



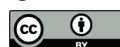

- 226 1. Strong ENSO floods affected South America in 1941, 1982-83, 1997-98 and 2015-16.
- 227 2. Rivers from the South American Arid Diagonal are only affected by ENSO floods. Those outside the
- 228 diagonal can be also affected by anomalous precipitations derived from the Atlantic or Pacific oceans.
- 229 3. Comparing the monthly discharges of several rivers, the 1982-82 and 1997-98 floods were of similar
- 230 magnitudes and should be considered to forecast future strong events and to organize mitigating plans.

## 231 Acknowledgements

232 The national services of Ecuador, Peru, Chile, Brazil and Argentina facilitated the monthly-collected data. An  
233 abstract of this paper was published during the EGU 2016, Vienna. This is a contribution to the floods project of  
234 Pages.

## 235 References

- 236 Andreoli, R. V. and Kayano, M. T., 2005. Enso-related rainfall anomalies in South America and associated
- 237 circulation features during warm and cold Pacific Decadal Oscillation regimes. *International Journal of Climatology*
- 238 25, 2017–2030.
- 239 Araya Ojeda, M. and Isla, F. I. 2016. Variabilidad hidrológica en la región del Biobío: Los eventos El Niño en
- 240 zonas templadas de Chile. *Revista Universitaria de Geografía*. UNS, 25, 1, 1-17.
- 241 Baez, J., Monte Domecq, R. and Lugo, L., 2014. Risk analysis in transboundary water of the rivers Pilcomayo and
- 242 Paraguay. In Leal W., Alves, F., Caeiro, S., Azeiteiro, U. M. (eds.) *International Perspectives on Climate Change:*
- 243 *Latin America and Beyond*. Ch. 2, Springer, 19-29.
- 244 Barros, V., Chamorro, L., Coronel, G. and Baez, J., 2004. The major discharge events in the Paraguay River:
- 245 magnitudes, source regions, and climate forcings. *Journal of Hydrometeorology* 5, 1161-1170.
- 246 Camilloni, I. A., and Barros, V. R., 2003. Extreme discharge events in the Paraná River and their climate forcing.
- 247 *Journal of Hydrology* 278, 94-106.
- 248 Campodónico, V. A., García, M. G. and Pasquini, A. I., 2015. The dissolved chemical and isotopic signature
- 249 downflow the confluence of two large rivers: The case of the Parana and Paraguay rivers. *Journal of Hydrology* 528,
- 250 161-176.
- 251 Clark, M. L., Aide, T. M., Riber, G., 2012. Land change for all municipalities in Latin America and the Caribbean
- 252 assessed from 250-m MODIS imagery (2001-2010). *Remote sensing of Environment* 126, 84-103.
- 253 Clement, A. C., Seager, R. and Cane, M. A. 2000. Suppression of El Niño during the mid-Holocene by changes in the
- 254 Earth's orbit. *Paleoceanography* 15, 6, 731-737.
- 255 Collischonn, W., Tucci, C. E. M. and Clarke, R. T., 2001. Further evidence of changes in the hydrological regime of
- 256 the River Paraguay: part of a wider phenomenon of climate change? *Journal of Hydrology* 245, 218-238.
- 257 Coronato, A.M.J., Coronato, F., Mazzoni, E. and Vazquez, M. 2008. The Physical Geography of Patagonia and
- 258 Tierra del Fuego. *Developments in Quaternary Sciences* 11 (3): 13-55.
- 259 Drago, E. C., 1989. Morphological and hydrological characteristics of the floodplain ponds of the Middle Paraná
- 260 River (Argentina). *Rev. Hydrobiol. Trop.* 22, 3, 183-190.
- 261 Drago, E. C., Paira, A. R. and Wantzen, K. M., 2008. Channel-floodplain geomorphology and connectivity of the
- 262 Lower Paraguay hydrosystem. *Ecology and Hydrobiology* 8, 1, 31-48.
- 263 EVARSA, 2006. Estadística hidrológica de la República Argentina. Buenos Aires, 2 volumes. Buenos Aires.





- 264 Fernández Long, M. E., Spescha, L., Hurtado, R. and Murphy, G. M., 2011. Impacto del ENOS sobre los  
265 rendimientos de maíz en la región pampeana argentina. *Agriscientia* 28, 31-38.
- 266 Ferrero, M. E., Villalba, R., De Membiela, M., Ferri Hidalgo, L. and Luckman, B. H., 2015. Tree-ring based  
267 reconstruction of Río Bermejo streamflow in subtropical South America. *Journal of Hydrology* 525, 572-584.
- 268 Forte Lay, J., Scarpatti, O. and Capriolo, A., 2008. Precipitation variability and soil water content in Pampean  
269 flatlands (Argentina). *Geofísica Internacional* 47, 4, 341-354.
- 270 García, M. L., Basile, P. A., Riccardi, G. A. and Rodríguez, J. F., 2015. Modelling extraordinary floods and  
271 sedimentological processes in a large channel- floodplain system of the Lower Paraná River (Argentina).  
272 *International Journal of Sediment Research* 30, 150-159.
- 273 González-Reyes, A. and Muñoz, A. A., 2013. Cambios en la precipitación en la ciudad de Valdivia (Chile) durante  
274 los últimos 150 años. *Bosque* 34, 2, 191-200.
- 275 Iriondo, M., Colombo, F. and Krohling, D., 2000. El abanico aluvial del Pilcomayo, Chaco (Argentina – Bolivia –  
276 Paraguay): Características y significado sedimentario. *Geogaceta* 28, 79-82.
- 277 Iroumé, A. and Palacios, H., 2013. Afforestation and changes in forest composition affect runoff in large river basins  
278 with pluvial regime and Mediterranean climate, Chile. *Journal of Hydrology* 505, 113-125.
- 279 Isla, F. I. and Toldo, E. E., 2013. ENSO impacts on Atlantic watersheds of South America. *Quaternary and*  
280 *Environmental Geosciences* 4(1-2), 34-41.
- 281 Krepper, C.M., García, N.O., Jones, P.D. 2003. Interannual variability in the Uruguay River basin. *International*  
282 *Journal of Climatology* 23:103-115.
- 283 Little, C., Lara, A., Mc Phee, J. and Urrutia, T., 2009. Revealing the impact of forest exotic plantations on water  
284 yield in large scale watersheds in South-Central Chile. *Journal of Hydrology* 374, 162-170.
- 285 Liu, F., Chen, H., Cai, H., Luo, X., Ou, S. and Yang, Q., 2017. Impacts of ENSO on multi-scale variations in  
286 sediment discharge from the Pearl River to the South China Sea. *Geomorphology* 293, 24-36.
- 287 Loitzenbauer, E., Bacchin, T. K., Gersonius, B., and Hilgefort, J., 2012. Linking the city and the lake: Guaíba  
288 waterfront, Porto Alegre, RS, Brazil. *2nd European conference of flood risk management*. Rotterdam, the  
289 Netherlands, 3 pp 
- 290 Lovino, M., García, M. O. and Baethgen, W., 2014. Spatiotemporal analysis of extreme precipitation events in  
291 Northeast Region of Argentina (NEA). *Journal of Hydrology: Regional Studies* 2, 140-158.
- 292 Magrin, G. O., Grondona, M. O., Travasso, M. I., Boullón, D. R., Rodríguez, G. R. and Messina, C. D., 1998.  
293 Impacto del fenómeno “El Niño” sobre la producción de cultivos en la Región Pampeana. INTA, Instituto de clima  
294 y agua, Castelar, 1-16.
- 295 Malbrunot, A., 2006. Síntesis de los conocimientos hasta la fecha, datos disponibles y elaboración de los parámetros  
296 principales aguas arriba de Misión La Paz (Argentina). Proyecto de Gestión Integrada y Plan Maestro de la Cuenca  
297 del Río Pilcomayo. Contrato Comisión Europea ASR/B7-3100/99/136, 147 pp.
- 298 Meza, F. J., 2013. Recent trends and ENSO influence on droughts in Northern Chile: An application of the  
299 Standardized Precipitation Evapotranspiration Index. *Weather and Climate* 1, 51-58.





- 300 Minetti, J. L. and Vargas, W. M., 1997. Trends and jumps in the annual precipitation in South America, south of  
301 15°S. *Atmósfera* 11, 205-221.
- 302 Monte Domecq, R., Chamorro, L., Avila, J.L., Perito, A. and Báez, J., 2003. Paraguay. In Tucci, C. E. M. and  
303 Bertoni, J. C. (eds.) *Inundaciones Urbanas en América del Sur*. Asociación Brasileira de Recursos Hídricos, Porto  
304 Alegre, Cap. 7, 325-378.
- 305 Monte Domecq, R. and Baez Benitez, J., 2007. Estudio de políticas y manejo ambiental de aguas subterráneas en el  
306 área metropolitana de Asunción (Acuífero Patiño). Informe 2.11. Balance hídrico del Acuífero Patiño. Consorcio  
307 CKC-JNS, 156 pp.
- 308 Ortega, C., Vargas, G., Rutllant, J. A., Jackson, D. and Méndez, C., 2012. Major hydrological regime change along  
309 the semiarid western coast of South America during the early Holocene. *Quaternary Research* 78, 513–527.
- 310 Pasquini, A. I. and Depetris, P.J., 2007. Discharge trends and flow dynamics of South American rivers draining the  
311 southern Atlantic seaboard: An overview. *Journal of Hydrology* 333, 385-399.
- 312 Pasquini, A. I. and Depetris, P.J., 2010. ENSO-triggered exceptional flooding in the Paraná River: Where is the  
313 excess water coming from? *Journal of Hydrology* 383, 186-193.
- 314 Pasquini, A. I., Lecomte, K. L. and Depetris, P. J., 2008. Climate change and recent water level variability in  
315 Patagonia proglacial lakes, Argentina. *Global and Planetary Change* 63, 290-298.
- 316 Pepin, E., Guyot, J. L., Armijos, E., Bazan, H., Fraizy, P., Moquet, J. S., Noriega, L., Lavado, W., Pombosa, R. and  
317 Vauchel, P., 2013. Climatic control on eastern Andean denudation rates (Central Cordillera from Ecuador to  
318 Bolivia). *Journal of South American Earth Sciences* 44, 85-93.
- 319 Prieto, M. R. and Rojas, F., 2015. Determination of droughts and high floods of the Bermejo River (Argentina)  
320 based on documentary evidence (17th to 20th century). *Journal of Hydrology* 529, 676-683.
- 321 Rabicaluc, H., 1986. Situación del Río Pilcomayo. Informe inédito 32H/86. Unpublished Report, Dirección de  
322 Recursos Hídricos de la Provincia de Formosa, 8 pp.
- 323 Ribstein, P. and Peña, J., 1993. Estudio hidrológico para la protección contra las inundaciones de Villa Montes  
324 (Bolivia). Proyecto ALA/90/23. Protección contra las inundaciones de Villa Montes. Corporación Regional del  
325 Desarrollo de Tarija, BCEOM - PROSER Consultores, 26 pp.
- 326 Rocha Felices, A., 2011. Las famosas lluvias de 1925 y 1926: ¿el primer meganiño del siglo XX? IV Congreso  
327 Internacional HIDRO 2011, Obras de Saneamiento, Hidráulica, Hidrología y Medio Ambiente, Lima, mayo 2011,  
328 10 pp.
- 329  
330 Rojas, O., Mardones, M., Arumí, J. L. and Aguayo, M., 2014. Una revisión de las inundaciones fluviales en Chile,  
331 período 1574-2012: Causas, recurrencia y efectos geográficos. *Revista de Geografía Norte Grande* 57, 177-192.
- 332 Rossel, F., Cadier, E. and Gómez, G., 1983. Las inundaciones en la zona costera ecuatoriana: causa, obras de  
333 protección existentes y previstas. *Bull. Inst. Franc. Etudes Andines* 25, 3, 399-420.
- 334 Scarpatti, O. E. and Capriolo, A. D., 2013. Sequías e inundaciones en la Provincia de Buenos Aires (Argentina) y su  
335 distribución espacio-temporal. Investigaciones Geográficas, Bol. Instituto de Geografía, UNAM, México, 82, 38-  
336 51.





- 337 Servicio Nacional de Meteorología e Hidrología del Perú 2016. Vigilancia hidrológica de los ríos del Perú.
- 338 SENAMHI, Lima, Bol. 5, 22 pp.
- 339 Sun, X., Renard, B., Thyer, M., Westra, S. and Lang, M., 2015. A global analysis of the asymmetric effect of ENSO
- 340 on extreme precipitation. *Journal of Hydrology* 530, 51-65.
- 341 Tucci, C. E. M. and Petry, B., 2006. Measures and solutions for flood management in South America: Selected cases
- 342 from the south and south-east of Brazil. In Van Amphel, J., Van Beek, E., and Taal, M. (eds.) *Floods: From defense*
- 343 *to management. Proc. of the 3rd. Intnl Symp. on Flood Defense.* Taylor and Francis, 217-226.
- 344 Ubilava, D., 2017. The ENSO effect and asymmetries in wheat price dynamics. *World Development* 96, 490-502.
- 345 Vaca, A., 2014. Proyecto “Implementación del sistema de alerta temprana en la Cuenca del Río Zarumilla”.
- 346 Secretaría Nacional de Gestión de Riesgos Instituto Nacional de Meteorología e Hidrología (INAMHI), Ecuador, 43
- 347 pp.
- 348 Valdés-Pineda, R., Pizarro, R., García-Chevesich, P., Valdés, J.B., Olivares, C., Vera, M., Balocchi, F., Perez, F.,
- 349 Vallejos, C., Fuentes, R., Abarza, A. and Helwig, B. 2014. Water governance in Chile: Availability, management
- 350 and climate change. *Journal of Hydrology*, 519, 2538-2567.
- 351
- 352 Vargas, G., Ortlieb, L., and Rutlant, J., 2000. Aluviones históricos en Antofagasta y su relación con eventos El
- 353 Niño/Oscilación del Sur. *Revista Geológica de Chile* 27, 2, 157-176.
- 354 Vargas, G., Rutlant, J. and Ortlieb, L., 2006. ENSO tropical-extratropical climate teleconnections and mechanisms
- 355 for Holocene debris flows along the hyperarid coast of western South America (17°-24°S). *Earth and Planetary*
- 356 *Science Letters* 249, 467-483.
- 357 Viglizzo, E. and Frank, F.C., 2006. Ecological interactions, feedbacks, thresholds and collapses in the Argentine
- 358 Pampas in response to climate and farming during the last century. *Quaternary International* 158, 122–126.
- 359 Ward, P. J., Kumm, M. and Lall, U., 2016. Flood frequencies and durations and their response to El Niño Southern
- 360 Oscillation: Global analysis. *Journal of Hydrology* 539, 358-378.
- 361 Waylen, P. R. and Caviedes, C.N., 1986. El Niño and annual floods on the north Peruvian littoral. *Journal of*
- 362 *Hydrology* 89, 141-156.
- 363 Waylen, P. R. and Caviedes, C.N., 1990. Annual and seasonal fluctuations of precipitation and streamflow in
- 364 the Aconcagua River basin, Chile. *Journal of Hydrology* 120, 79-102.
- 365 Zhang, Q., Gu, X., Singh, V. P., Liu, L. and Kong, D., 2016. Flood-induced agricultural loss across China and
- 366 impacts from climate indices. *Global and Planetary Change* 139, 31-43.
